# Supplementary material
Source: publisher figshare collection journal article supplement (https://tandf.figshare.com/ndownloader/files/30464008)
Supplement: Supplementary file 1 [file 30464008]

## Sheet: Sheet1
Variables	Delinquency	Treatment	cohesion	flexibility	disengaged	enmeshed	rigid	chao	familycommun	familysatisfaction	Transitions and mobility	Low neighborhood attachment	Community disorganization	Laws and norms favorable to drug use	Perceived availability of drugs	Opportunities for prosocial involvement	Rewards for prosocial involvement	Overall community domain average	Family history of antisocial behavior	Parental attitudes favorable toward drug use	Poor family management	Family conflict	Weak parental supervision	Family gang influence	Attachment	Opportunities for prosocial involvement	Rewards for prosocial involvement	Overall family domain average	Rebelliousness	Rewards for antisocial involvement	Favorable attitudes toward drug use	Favorable attitudes toward antisocial behavior	Perceived risks of drug use	Friends’ use of drugs	Interaction with antisocial peer	Intentions to use	Antisocial tendencies	Critical life events	Impulsive risk taking	Neutralization of guilt	Negative peer influence	Peer delinquency	Belief in the moral order	Rewards for prosocial involvement	Interaction with prosocial peers	Social skills	Overall peer/individual domain average	Overall risk factor average score
Delinquency	1
Treatment	-0.008	1
FACES measure
cohesion	-0.062*	0.236***	1
flexibility	-0.062*	0.238***	0.746***	1
disengaged	0.036	-0.278***	-0.370***	-0.298***	1
enmeshed	-0.073**	0.032	0.460***	0.458***	-0.053	1
rigid	-0.007	0.175***	0.493***	0.615***	-0.106***	0.473***	1
chao	0.019	-0.417***	-0.481***	-0.433***	0.605***	-0.081**	-0.272***	1
familycommun	-0.087**	0.141***	0.707***	0.676***	-0.352***	0.442***	0.441***	-0.426***	1
familysatisfaction	-0.017	0.258***	0.511***	0.472***	-0.376***	0.279***	0.287***	-0.480***	0.607***	1
Community risk factor
Transitions and mobility	0.034	0.001	-0.005	0.012	-0.049	-0.01	0.007	-0.028	-0.058*	-0.037	1
Low neighborhood attachment	0.077**	0.057	0.032	0.021	-0.048	0.007	0.02	-0.03	0.015	0.008	0	1
Community disorganization	0.140***	0.021	-0.011	0.023	-0.021	-0.012	0.086**	-0.04	0.001	0.007	0.080**	0.137***	1
Laws and norms favorable to drug use	0.212***	0.012	-0.051	-0.042	0.017	-0.102***	-0.047	-0.018	-0.061*	0.027	0.005	0.078**	-0.064*	1
Perceived availability of drugs	0.401***	-0.036	-0.046	-0.04	0.043	-0.055	0.015	0.012	-0.094***	-0.048	0.043	0.127***	0.149***	0.315***	1
Community protective factor
Opportunities for prosocial involvement	0.008	0.102***	0.038	0.025	0.031	-0.003	0.060*	-0.028	0.037	0.036	0.005	-0.140***	0.217***	-0.177***	-0.026	1
Rewards for prosocial involvement	0.087**	-0.072**	-0.077**	-0.075**	0.031	-0.075**	-0.070*	0.076**	-0.091**	-0.079**	0.054	0.221***	-0.074**	0.200***	0.208***	-0.360***	1
Overall community domain average	0.303***	0.012	-0.006	0.014	-0.041	-0.023	0.042	-0.058*	-0.043	0.003	0.277***	0.523***	0.408***	0.426***	0.617***	-0.262***	-0.086**	1
Family risk factors:
Family history of antisocial behavior	0.449***	0.083**	0.022	0.013	0.025	-0.021	0.056	-0.03	-0.025	0.013	0.079**	0.085**	0.208***	0.182***	0.425***	0.038	0.110***	0.322***	1
Parental attitudes favorable toward drug use	0.252***	0.055	-0.027	-0.05	0.074**	-0.02	-0.04	0.006	-0.033	0.036	0.04	0.049	-0.014	0.274***	0.171***	-0.071**	0.082**	0.181***	0.142***	1
Poor family management	0.319***	-0.064*	-0.175***	-0.121***	0.092**	-0.075**	-0.075**	0.156***	-0.198***	-0.189***	0.074**	0.151***	-0.005	0.261***	0.268***	-0.209***	0.276***	0.242***	0.253***	0.232***	1
Family conflict	0.265***	-0.094***	-0.171***	-0.162***	0.123***	-0.100***	-0.058*	0.117***	-0.183***	-0.213***	0.127***	0.131***	0.205***	0.103***	0.252***	0.003	0.179***	0.225***	0.253***	0.128***	0.272***	1
Weak parental supervision	0.289***	-0.165***	-0.168***	-0.168***	0.135***	-0.057	-0.101***	0.173***	-0.163***	-0.185***	0.075**	0.062*	0.04	0.161***	0.204***	-0.106***	0.184***	0.160***	0.179***	0.165***	0.516***	0.291***	1
Family gang influence	0.409***	0.03	-0.028	-0.01	0.045	-0.033	0.045	-0.001	-0.022	-0.013	0.058*	0.088**	0.201***	0.200***	0.369***	0.019	0.102***	0.304***	0.443***	0.196***	0.186***	0.223***	0.189***	1
Family protective factors:
Attachment	-0.276***	0.065*	0.124***	0.120***	-0.037	0.071**	0.055	-0.069*	0.128***	0.121***	-0.058*	-0.147***	-0.046	-0.286***	-0.333***	0.189***	-0.311***	-0.269***	-0.253***	-0.238***	-0.466***	-0.351***	-0.380***	-0.253***	1
Opportunities for prosocial involvement	-0.206***	0.087**	0.121***	0.100***	-0.067*	0.051	0.094***	-0.126***	0.129***	0.146***	-0.008	-0.145***	0.045	-0.262***	-0.280***	0.248***	-0.359***	-0.193***	-0.177***	-0.137***	-0.468***	-0.264***	-0.371***	-0.174***	0.660***	1
Rewards for prosocial involvement	-0.224***	0.097***	0.125***	0.105***	-0.044	0.076**	0.068*	-0.065*	0.107***	0.121***	-0.068*	-0.108***	0.009	-0.227***	-0.301***	0.206***	-0.322***	-0.206***	-0.159***	-0.195***	-0.476***	-0.332***	-0.390***	-0.162***	0.747***	0.551***	1
Overall family domain average	0.456***	-0.093***	-0.180***	-0.160***	0.117***	-0.097***	-0.077**	0.134***	-0.190***	-0.194***	0.108***	0.180***	0.119***	0.329***	0.456***	-0.175***	0.359***	0.365***	0.467***	0.344***	0.677***	0.635***	0.617***	0.479***	-0.802***	-0.719***	-0.744***	1
Peer/individual risk factors:
Rebelliousness	0.254***	-0.193***	-0.097***	-0.073**	0.108***	-0.017	-0.061*	0.159***	-0.178***	-0.182***	0.059*	0.019	0.022	0.153***	0.256***	-0.082**	0.158***	0.159***	0.156***	0.123***	0.290***	0.268***	0.328***	0.136***	-0.285***	-0.261***	-0.264***	0.386***	1
Rewards for antisocial involvement	0.350***	-0.054	-0.044	-0.067*	0.024	-0.007	-0.021	0.035	-0.071**	-0.089**	0.043	0.068*	0.047	0.239***	0.331***	-0.118***	0.164***	0.256***	0.226***	0.190***	0.257***	0.167***	0.242***	0.243***	-0.295***	-0.247***	-0.230***	0.364***	0.213***	1
Favorable attitudes toward drug use	0.407***	0.031	-0.038	-0.033	-0.019	-0.049	-0.027	0.006	-0.016	0.031	0.021	0.038	-0.053	0.249***	0.239***	-0.162***	0.133***	0.194***	0.158***	0.353***	0.292***	0.125***	0.197***	0.193***	-0.273***	-0.206***	-0.245***	0.337***	0.144***	0.309***	1
Favorable attitudes toward antisocial behavior	0.268***	0.083**	-0.101***	-0.091**	0.037	-0.011	-0.072**	0.02	-0.05	0.038	0.038	0.048	-0.080**	0.222***	0.117***	-0.085**	0.120***	0.102***	0.062*	0.405***	0.239***	0.047	0.175***	0.102***	-0.194***	-0.143***	-0.192***	0.241***	0.161***	0.187***	0.580***	1
Perceived risks of drug use	0.250***	0.084**	-0.026	-0.027	0.023	0	-0.008	0.039	-0.036	0.016	-0.003	0.004	-0.088**	0.174***	0.144***	-0.047	0.061*	0.083**	0.059*	0.187***	0.280***	0.031	0.195***	0.081**	-0.145***	-0.132***	-0.159***	0.206***	0.060*	0.184***	0.362***	0.287***	1
Friends’ use of drugs	0.621***	-0.013	-0.068*	-0.073**	0.041	-0.051	-0.009	0.014	-0.055	0.011	0.039	0.077**	0.146***	0.198***	0.442***	0.026	0.104***	0.309***	0.457***	0.194***	0.312***	0.252***	0.287***	0.351***	-0.286***	-0.213***	-0.212***	0.438***	0.217***	0.316***	0.287***	0.149***	0.224***	1
Interaction with antisocial peer	0.505***	0.065*	-0.012	-0.011	0.032	-0.065*	0.061*	-0.045	-0.034	0.034	0.025	0.043	0.179***	0.154***	0.307***	0.080**	-0.016	0.257***	0.431***	0.199***	0.211***	0.203***	0.218***	0.321***	-0.185***	-0.136***	-0.141***	0.341***	0.133***	0.190***	0.225***	0.168***	0.154***	0.605***	1
Intentions to use	0.448***	-0.003	-0.045	-0.048	0.027	-0.026	-0.014	0.033	-0.069*	-0.038	0.019	0.066*	0.037	0.263***	0.326***	-0.071**	0.183***	0.224***	0.309***	0.209***	0.328***	0.249***	0.284***	0.247***	-0.332***	-0.272***	-0.278***	0.439***	0.279***	0.359***	0.289***	0.172***	0.179***	0.403***	0.285***	1
Antisocial tendencies	0.251***	-0.070*	-0.100***	-0.104***	0.054	-0.080**	-0.053	0.067*	-0.142***	-0.079**	0.085**	0.135***	0.084**	0.171***	0.187***	-0.089**	0.219***	0.181***	0.136***	0.099***	0.306***	0.365***	0.307***	0.147***	-0.297***	-0.224***	-0.284***	0.408***	0.331***	0.185***	0.167***	0.145***	0.090**	0.172***	0.090**	0.245***	1
Critical life events	0.328***	0.062*	-0.028	-0.027	0.038	-0.062*	0.021	0.003	-0.071**	-0.008	0.136***	0.132***	0.211***	0.127***	0.252***	0.074**	0.066*	0.263***	0.276***	0.144***	0.174***	0.252***	0.175***	0.264***	-0.204***	-0.094***	-0.176***	0.309***	0.166***	0.174***	0.162***	0.099***	0.05	0.292***	0.351***	0.209***	0.170***	1
Impulsive risk taking	0.384***	-0.103***	-0.058*	-0.074**	0.017	-0.056	-0.029	0.057	-0.113***	-0.084**	0.047	0.046	0.071**	0.174***	0.319***	-0.03	0.184***	0.190***	0.279***	0.148***	0.277***	0.328***	0.314***	0.257***	-0.354***	-0.284***	-0.345***	0.471***	0.473***	0.298***	0.189***	0.140***	0.098***	0.299***	0.232***	0.374***	0.352***	0.269***	1
Neutralization of guilt	0.357***	-0.055	-0.046	-0.075**	0.042	-0.032	-0.052	0.028	-0.111***	-0.077**	0.073**	0.045	0.009	0.157***	0.240***	-0.05	0.172***	0.144***	0.191***	0.145***	0.291***	0.304***	0.251***	0.170***	-0.297***	-0.250***	-0.272***	0.398***	0.402***	0.278***	0.245***	0.230***	0.121***	0.233***	0.144***	0.332***	0.355***	0.238***	0.508***	1
Negative peer influence	0.229***	-0.087**	-0.038	-0.055	0.059*	-0.064*	-0.015	0.086**	-0.056	-0.063*	-0.049	-0.028	-0.063*	0.148***	0.232***	-0.031	0.094***	0.080**	0.148***	0.080**	0.219***	0.185***	0.209***	0.137***	-0.278***	-0.214***	-0.225***	0.310***	0.264***	0.176***	0.152***	0.111***	0.109***	0.199***	0.152***	0.225***	0.141***	0.091**	0.325***	0.262***	1
Peer delinquency	0.640***	0.066*	-0.018	-0.013	-0.031	-0.086**	0.023	-0.035	-0.01	0.049	-0.006	0.067*	0.186***	0.180***	0.303***	0.019	0.026	0.270***	0.403***	0.176***	0.261***	0.203***	0.275***	0.344***	-0.230***	-0.152***	-0.142***	0.368***	0.126***	0.247***	0.298***	0.195***	0.193***	0.609***	0.558***	0.362***	0.185***	0.273***	0.232***	0.193***	0.170***	1
Peer/individual protective factors:
Belief in the moral order	-0.374***	0.064*	0.038	0.053	-0.041	0.035	0.039	-0.057	0.088**	0.061*	-0.107***	-0.078**	-0.072**	-0.224***	-0.260***	0.046	-0.214***	-0.195***	-0.261***	-0.219***	-0.371***	-0.304***	-0.294***	-0.221***	0.319***	0.226***	0.294***	-0.443***	-0.289***	-0.272***	-0.274***	-0.262***	-0.145***	-0.271***	-0.187***	-0.343***	-0.359***	-0.189***	-0.355***	-0.484***	-0.247***	-0.297***	1
Rewards for prosocial involvement	-0.107***	-0.03	-0.085**	-0.058*	0.052	-0.008	-0.045	0.081**	-0.041	-0.079**	-0.038	-0.055	-0.133***	-0.044	-0.150***	-0.082**	0.090**	-0.175***	-0.160***	-0.042	0.084**	-0.070*	0.068*	-0.094***	-0.047	-0.095***	-0.090**	0.012	0.039	-0.036	0.068*	0.043	0.098***	-0.051	-0.064*	-0.011	0.05	-0.093***	-0.029	-0.011	-0.042	-0.070**	0.077**	1
Interaction with prosocial peers	-0.140***	0.128***	0.088**	0.103***	-0.127***	0.025	0.053	-0.141***	0.131***	0.144***	-0.009	-0.088**	0.012	-0.114***	-0.108***	0.160***	-0.181***	-0.099***	-0.027	-0.109***	-0.280***	-0.148***	-0.256***	-0.044	0.146***	0.179***	0.208***	-0.252***	-0.213***	-0.140***	-0.186***	-0.122***	-0.099***	-0.093***	0.034	-0.114***	-0.187***	-0.018	-0.128***	-0.158***	-0.094***	-0.029	0.167***	-0.167***	1
Social skills	-0.421***	0.051	0.025	0.036	-0.061*	0.018	0.054	-0.060*	0.069*	0.060*	-0.032	-0.025	-0.071**	-0.182***	-0.295***	0.078**	-0.171***	-0.190***	-0.259***	-0.179***	-0.368***	-0.259***	-0.377***	-0.198***	0.288***	0.241***	0.275***	-0.429***	-0.332***	-0.269***	-0.285***	-0.224***	-0.156***	-0.354***	-0.194***	-0.404***	-0.293***	-0.127***	-0.354***	-0.346***	-0.275***	-0.316***	0.400***	-0.006	0.238***	1
Overall peer/individual domain average	0.691***	-0.052	-0.085**	-0.103***	0.075**	-0.070*	-0.04	0.078**	-0.143***	-0.079**	0.079**	0.116***	0.106***	0.348***	0.502***	-0.090**	0.243***	0.374***	0.439***	0.349***	0.518***	0.416***	0.476***	0.387***	-0.479***	-0.377***	-0.429***	0.676***	0.520***	0.549***	0.547***	0.434***	0.390***	0.640***	0.499***	0.623***	0.465***	0.431***	0.629***	0.594***	0.437***	0.563***	-0.611***	-0.127***	-0.365***	-0.610***	1
Overall risk factor average score	0.639***	-0.064*	-0.124***	-0.122***	0.083**	-0.085**	-0.046	0.086**	-0.169***	-0.125***	0.152***	0.256***	0.198***	0.424***	0.603***	-0.181***	0.266***	0.580***	0.500***	0.380***	0.620***	0.545***	0.556***	0.487***	-0.657***	-0.548***	-0.593***	0.869***	0.487***	0.512***	0.487***	0.368***	0.320***	0.604***	0.476***	0.580***	0.472***	0.428***	0.588***	0.529***	0.389***	0.528***	-0.565***	-0.104***	-0.326***	-0.560***	0.920***	1
*** p<0.01, ** p<0.05, * p<0.1

## Sheet: pre-post treat corr
corr coeff between pre-post treatment score by age group
Variables	12 years and younger	13 years and older
Community risk factor
Transitions and mobility	0.36	0.42
Low neighborhood attachment	0.19	0.32
Community disorganization	0.17	0.32
Laws and norms favorable to drug use	0.11	0.38
Perceived availability of drugs	0.23	0.43
Community protective factor
Opportunities for prosocial involvement	0.20	0.42
Rewards for prosocial involvement	0.18	0.39
Overall community domain average	0.18	0.27
Family risk factors:
Family history of antisocial behavior	0.41	0.52
Parental attitudes favorable toward drug use	0.13	0.20
Poor family management	0.13	0.44
Family conflict	0.19	0.41
Weak parental supervision	0.22	0.30
Family gang influence	0.30	0.37
Family protective factors:
Attachment	0.38	0.51
Opportunities for prosocial involvement	0.14	0.41
Rewards for prosocial involvement	0.27	0.51
Overall family domain average	0.35	0.57
Peer/individual risk factors:
Rebelliousness	0.01	0.12
Rewards for antisocial involvement	0.15	0.35
Favorable attitudes toward drug use	0.12	0.16
Favorable attitudes toward antisocial behavior	0.20	0.16
Perceived risks of drug use	0.23	0.24
Friends’ use of drugs	0.22	0.46
Interaction with antisocial peer	0.11	0.46
Intentions to use	0.16	0.35
Antisocial tendencies	0.25	0.29
Critical life events	0.21	0.33
Impulsive risk taking	0.18	0.14
Neutralization of guilt	0.07	0.09
Negative peer influence	0.07	0.23
Peer delinquency	0.30	0.40
Peer/individual protective factors:
Belief in the moral order	0.19	0.24
Rewards for prosocial involvement	0.09	0.25
Interaction with prosocial peers	0.18	0.33
Social skills	0.19	0.18
Overall peer/individual domain average	0.19	0.41
Overall risk factor average score	0.28	0.51
Delinquency
Violence behavior	0.16	0.26
Property crime	0.22	0.26
Gang involvement	0.29	0.51
Alcohol/drug use	0.21	0.49
Drug selling	0.31	0.59
Carrying weapon	0.18	0.42
General delinquency	0.32	0.56
